# Supplementary material for: Sci-Hub provides access to nearly all scholarly literature
Source: eLife journal article supplement (doi:10.7554/elife.32822), 2018-02-09
Supplement: supp [file elife-32822-supp-v1.zip]

Archive with 6 entries (6 files):
- elife_poa_e32822_Figure_1_figure_supplement_1.pdf
- elife_poa_e32822_Figure_4_figure_supplement_1.pdf
- elife_poa_e32822_Figure_10_figure_supplement_1.pdf
- elife_poa_e32822_Figure_11_figure_supplement_1.pdf
- elife_poa_e32822_Figure_6_figure_supplement_1.pdf
- elife_poa_e32822_Figure_7_figure_supplement_1.pdf
