# Supplementary figures and images for: Sci-Hub provides access to nearly all scholarly literature
Source: eLife journal article supplement (doi:10.7554/elife.32822), 2018-02-09

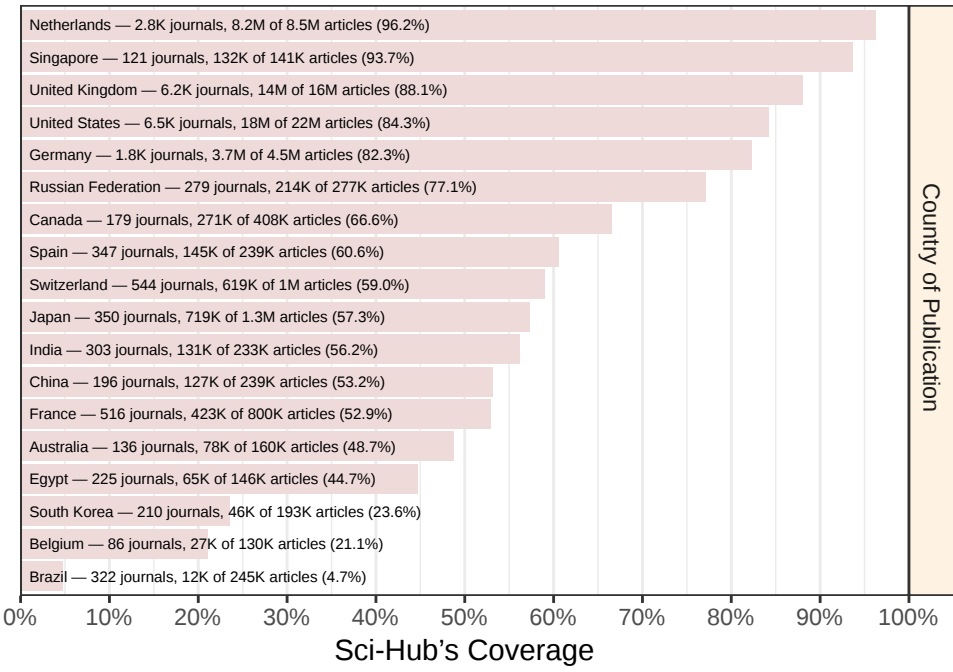

Supplement: supp [file elife-32822-supp-v1.zip]

Sci-Hub Downloads per Day

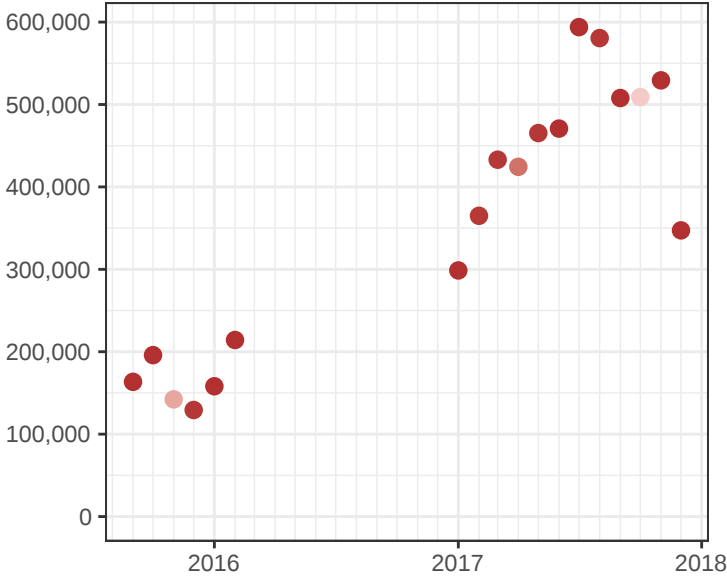

Supplement: supp [file elife-32822-supp-v1.zip]

Sci-Hub's Coverage

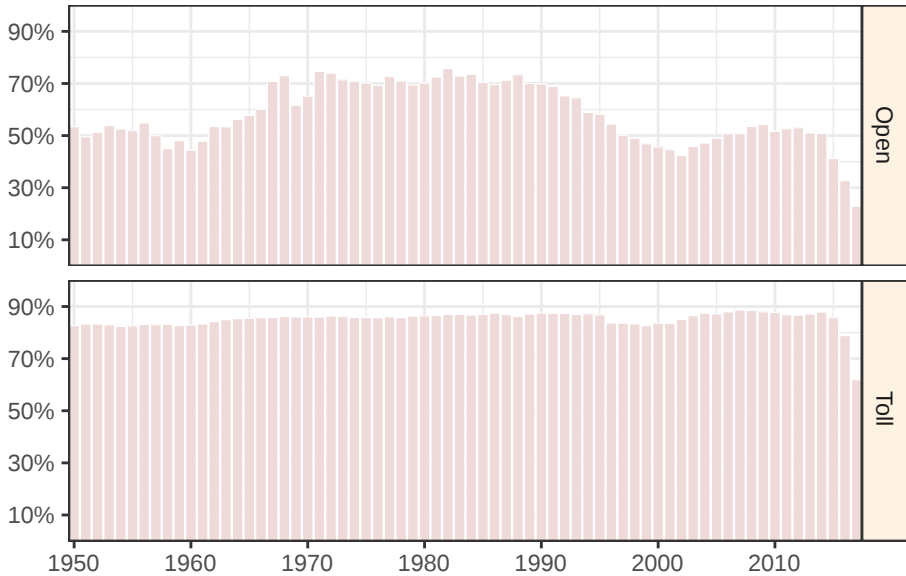

Supplement: supp [file elife-32822-supp-v1.zip]

Number of Donations

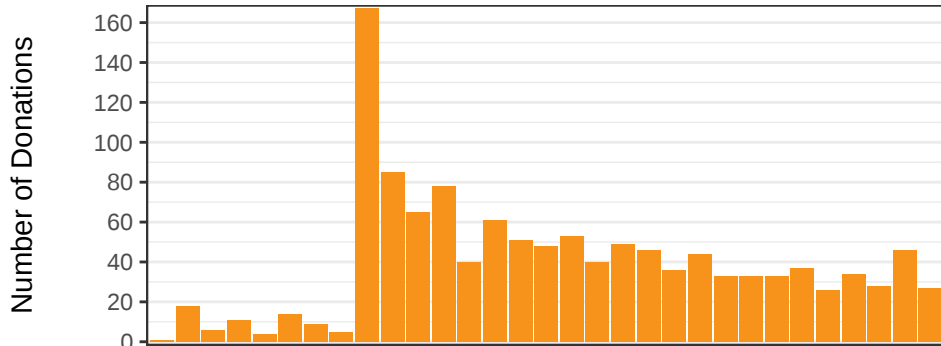

Donations in BTC

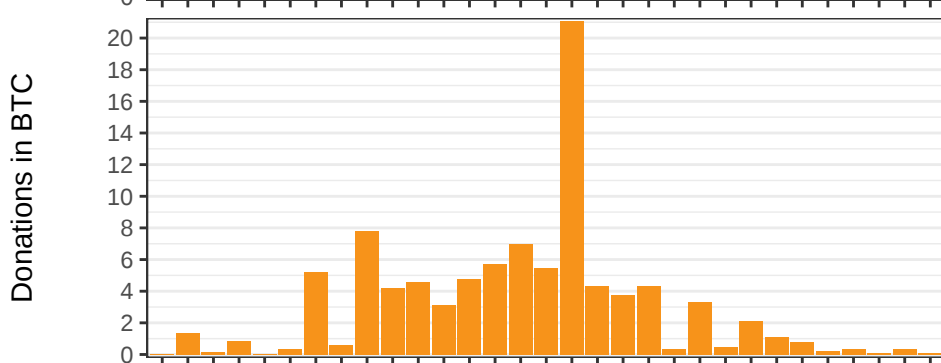

Donations in USD

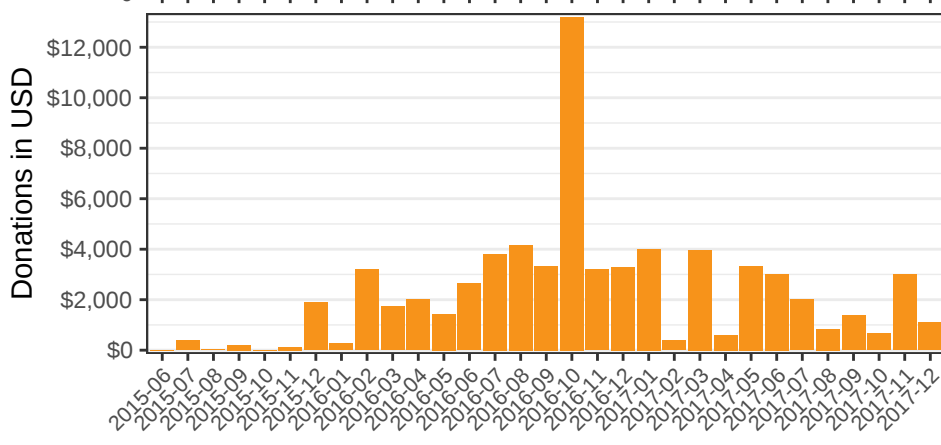

Supplement: supp [file elife-32822-supp-v1.zip]

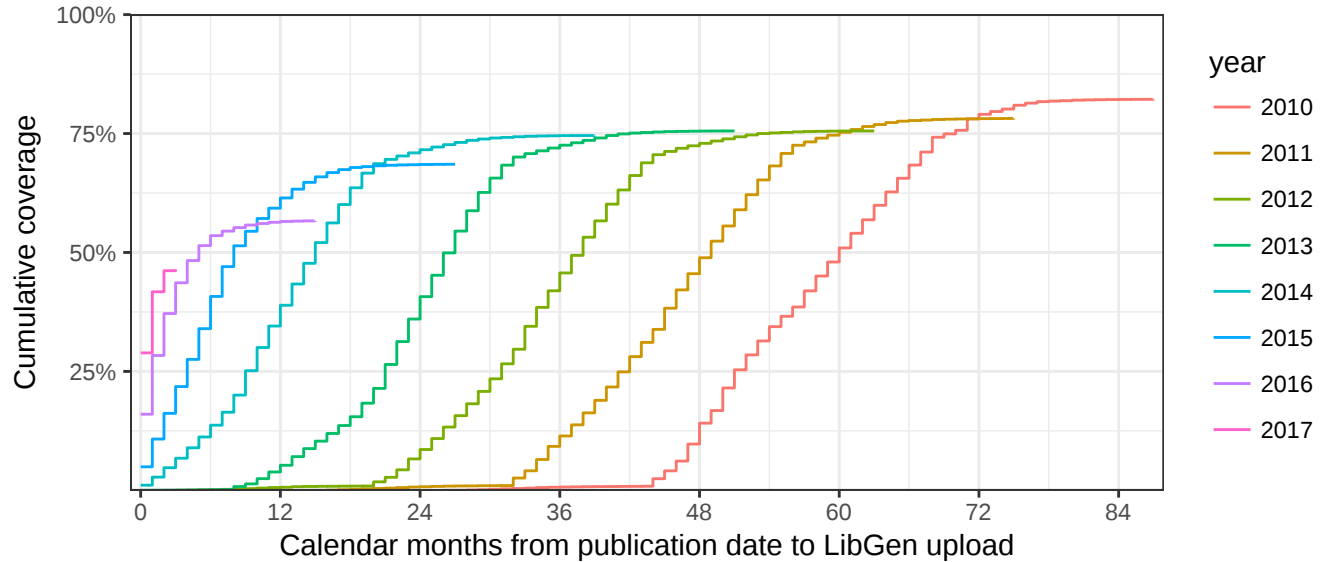

Supplement: supp [file elife-32822-supp-v1.zip › elife_poa_e32822_Figure_11_figure_supplement_1.pdf]

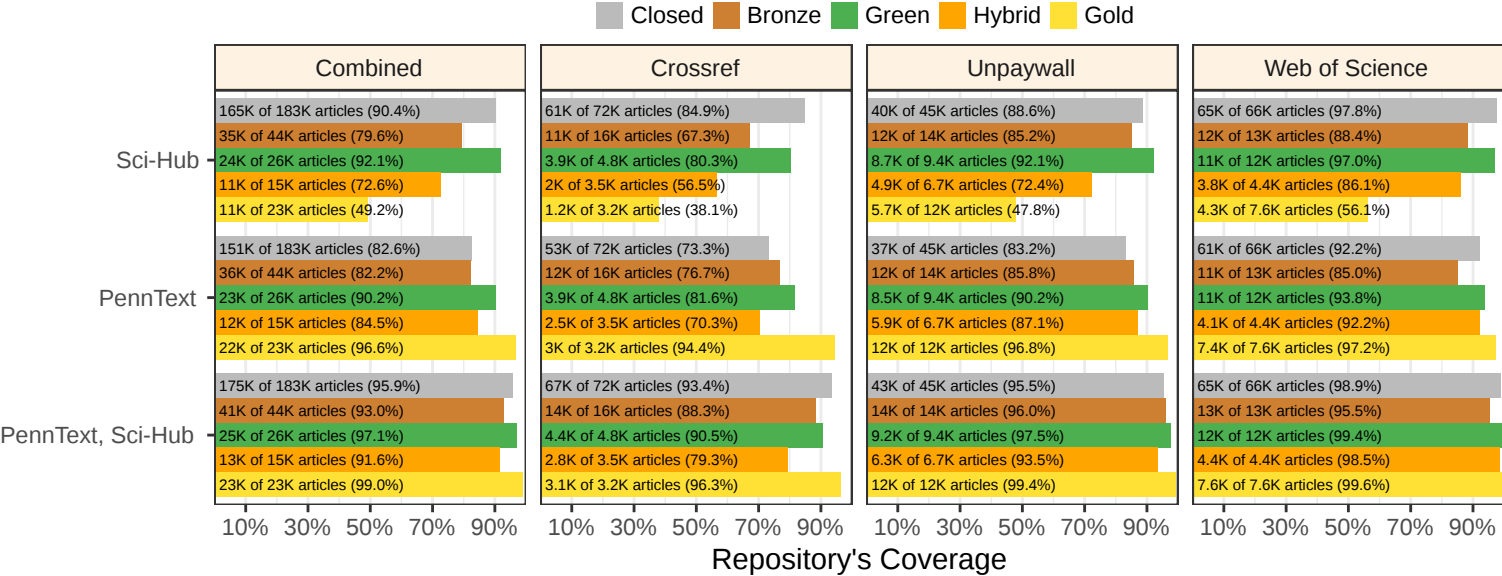

Supplement: supp [file elife-32822-supp-v1.zip › elife_poa_e32822_Figure_7_figure_supplement_1.pdf]
